# Supplementary material for: The factors affecting the assembly of Keggin–metal–bimb systems: charge/polarity of Keggin polyanions and coordination modes of metal cations
Source: Royal Society of Chemistry journal article supplement (doi:10.1039/c6ce00880a), 2016-01-01
Supplement: c6ce00880a1.pdf [file c6ce00880a1.pdf]

Electric Supplemental Information for:

**The Factors Affecting on the Assembly of Keggin-Metal-Bimb System: Charge/Polarity of Keggin Polyanions and Coordination modes of Metal Cations**

Chunyan Zhao<sup>a,b</sup>, Shaobin Li<sup>a,b</sup>, Huiyuan Ma<sup>\*a</sup>, Chunjing Zhang<sup>a,c</sup>, Haijun Pang<sup>\*a</sup>, Yan Yu<sup>a,b</sup>, and Zhuanfang Zhang<sup>a,b</sup>

**Table of contents:**

- 1. Table S1.** A summarization of the coordination modes of POM clusters and the coordination geometries of metal cations in compounds **1-6**
- 2. Fig. S1.** (a) Ball-and-stick representation of the (4,4) sheet structure in **1**. (b) The ladder-like chain in **1**.
- 3. Fig. S2.** View of bamboo-shaped cylinder in **2**.
- 4. Figure S3.** View of per joint in the bamboo-shaped cylinder in **2**.
- 5. Fig. S4.** View of the 1D undulated chain in **2**. (b) the topology of the 3D framework in **2**. Color codes: pink, connected nodes of Co cations, blue, connected nodes of GeW<sub>12</sub> anions.
- 6. Fig. S5.** XPS of compound **1**.
- 7. Fig. S6.** The IR spectra of compounds **1-6**.
- 8. Fig. S7.** The simulative (red) and experimental (black) powder X-ray diffraction patterns for **1-6**.
- 9. Fig. S8.** Solid-state emission spectrum of bimb ( $\lambda_{ex} = 310$  nm) at room temperature.

**Table S1.** A summarization of the coordination modes of POM clusters and the coordination geometries of metal cations in compounds **1-6**

| Compound          | 1                                                                                                                                              | 2                                                                                                                                           | 3                                                                                                                                               | 4                                                                                                                                                | 5                                                                                                                                            | 6                                                                                                                                            |
|-------------------|------------------------------------------------------------------------------------------------------------------------------------------------|---------------------------------------------------------------------------------------------------------------------------------------------|-------------------------------------------------------------------------------------------------------------------------------------------------|--------------------------------------------------------------------------------------------------------------------------------------------------|----------------------------------------------------------------------------------------------------------------------------------------------|----------------------------------------------------------------------------------------------------------------------------------------------|
| Coordination mode |                                                                                                                                                |                                                                                                                                             |                                                                                                                                                 |                                                                                                                                                  |                                                                                                                                              |                                                                                                                                              |
| POM cluster       | 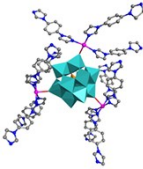<br>tritopic PW <sub>12</sub>                                 | <br>hexadentate W <sub>12</sub>                            | <br>hexadentate W <sub>12</sub>                                | <br>hexadentate W <sub>12</sub>                                | <br>ditopic BW <sub>12</sub>                              | <br>hexadentate BW <sub>12</sub>                          |
| Metal cation      | <br>Three crystallographic-ally independent Co <sup>2+</sup> | <br>One crystallographic-ally independent Co <sup>2+</sup> | <br>One crystallographically-ally independent Co <sup>2+</sup> | <br>One crystallographically-ally independent Co <sup>2+</sup> | <br>One crystallographic-ally independent Cu <sup>+</sup> | <br>One crystallographic-ally independent Ag <sup>+</sup> |

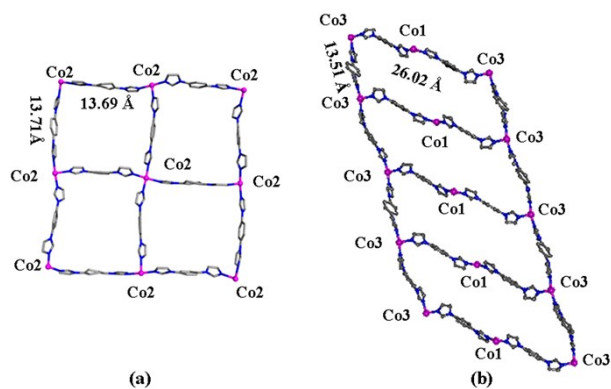

**Fig. S1.** (a) Ball-and-stick representation of the (4,4) sheet structure in **1**. (b) The ladder-like chain in **1**.

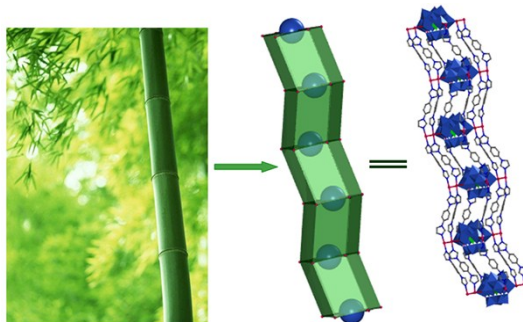

**Fig. S2.** View of bamboo-shaped cylinder in **2**.

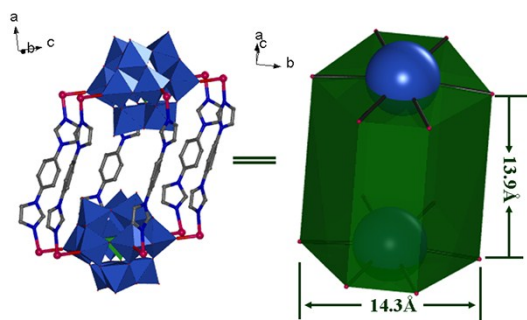

**Fig. S3.** View of per joint in the bamboo-shaped cylinder in **2**.

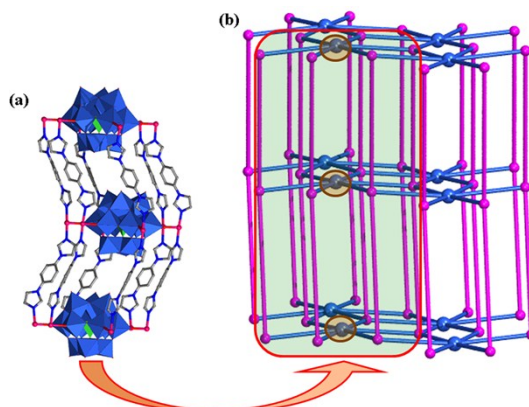

**Fig. S4.** View of the 1D undulated chain in **2**. (b) the topology of the 3D framework in **2**. Color codes: pink, connected nodes of Co cations, blue, connected nodes of  $\text{GeW}_{12}$  anions.

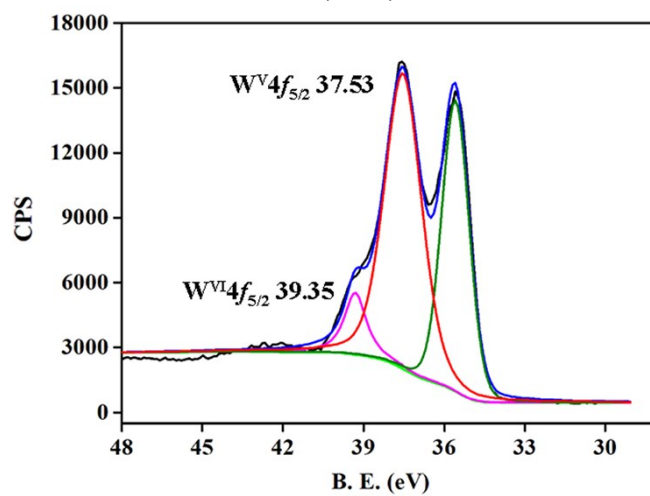

**Fig. S5.** XPS of compound **1**.

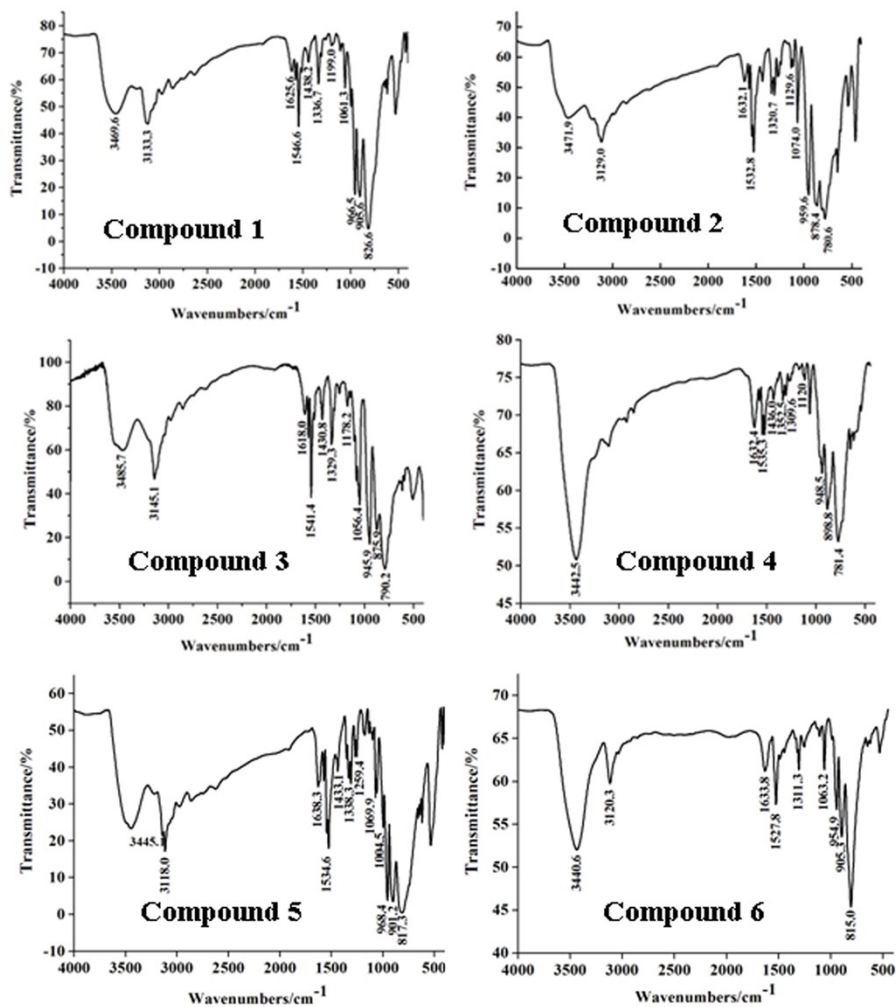

Figure S6. The IR spectra of compounds 1-6.

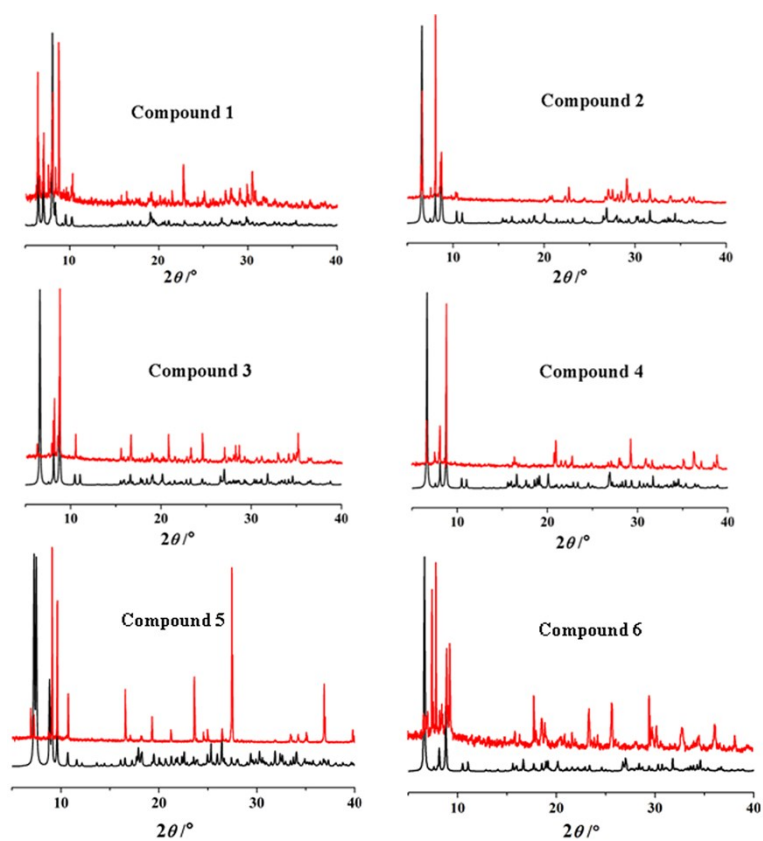

**Fig. S7.** The simulative (red) and experimental (black) powder X-ray diffraction patterns for **1-6**.

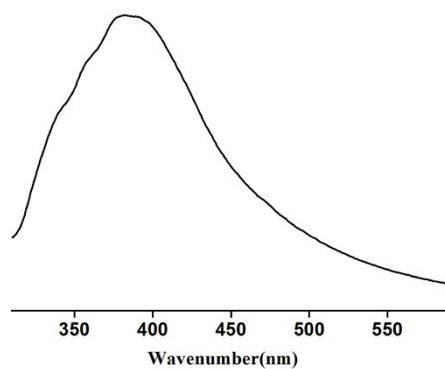

**Fig. S8.** Solid-state emission spectrum of bimb ( $\lambda_{\text{ex}} = 310 \text{ nm}$ ) at room temperature.
